# Supplementary material
Source: publisher figshare collection journal article supplement (https://aacr.figshare.com/articles/dataset/_/22429818)
Supplement: Supplementary file 1 [file 39876153]

**Supplementary Table 1. Antibodies used in this study**

| <b>Antibody</b>                    | <b>Clone, source</b>       | <b>Dilution</b> | <b>Company</b> | <b>Catalog No.</b> |
|------------------------------------|----------------------------|-----------------|----------------|--------------------|
| <b>For Flow Cytometry Staining</b> |                            |                 |                |                    |
| Anti-mouse H-2K <sup>d</sup>       | Mouse IgG2a (SF1-1.1)      | 1:100           | BD             | 553566             |
| Anti-mouse CD45                    | Rat IgG2b (30-F11)         | 1:100           | BD             | 553081             |
| Anti-mouse CD140b                  | Rat IgG2a (APB5)           | 1:100           | BioLegend      | 136006             |
| Anti-mouse CD235a                  | Mouse IgG2b (GA-R2)        | 1:100           | BD             | 561051             |
| Anti-mouse CD31                    | Rat IgG2a (MEC13.3)        | 1:100           | BD             | 561073             |
| Anti-mouse CD45                    | Rat IgG2b (30-F11)         | 1:100           | BioLegend      | 103108             |
| Anti-mouse CD11b                   | Rat IgG2b (M1/70)          | 1:80            | BioLegend      | 101208             |
| Anti-mouse Gr1                     | Rat IgG2b (RB6-8C5)        | 1:80            | BioLegend      | 108412             |
| Anti-mouse Ly-6C                   | Rat IgG2c (HK1.4)          | 1:100           | BioLegend      | 128012             |
| Anti-mouse Ly-6G                   | Rat IgG2a (1A8)            | 1:100           | BioLegend      | 127624             |
| Anti-mouse CD3                     | Rat IgG2b (17A2)           | 1:80            | BioLegend      | 100222             |
| Anti-mouse CD4                     | Rat IgG2b (GK1.5)          | 1:80            | BioLegend      | 100434             |
| Anti-mouse CD8a                    | Rat IgG2a (53-6.7)         | 1:50            | BioLegend      | 100706             |
| Anti-mouse TNF-a                   | Rat IgG1 (MP6-XT22)        | 1:50            | BioLegend      | 506318             |
| Anti-mouse IFN-y                   | Rat IgG1 (XMG1.2)          | 1:50            | BioLegend      | 505850             |
| <b>For Western Blotting</b>        |                            |                 |                |                    |
| ALDH1A1                            | Rabbit IgG (EP1933Y)       | 1:1000          | Abcm           | ab52492            |
| Flag                               | Rabbit IgG (F7425)         | 1:1000          | Sigma          | F7425              |
| <b>IκBα</b>                        | Rabbit IgG (44D4)          | 1:1000          | CST            | 4812s              |
| <b>p-IκBα</b>                      | Rabbit IgG (14D4)          | 1:1000          | CST            | 2859s              |
| p65                                | Rabbit IgG (D14E12)        | 1:1000          | CST            | 8242s              |
| p-p65                              | Rabbit IgG (93H1)          | 1:1000          | CST            | 3033s              |
| TAK1                               | Rabbit IgG (D94D7)         | 1:1000          | CST            | 5206s              |
| p-TAK1                             | Rabbit IgG (90C7)          | 1:1000          | CST            | 4508s              |
| JNK                                | Rabbit Polyclonal Antibody | 1:1000          | CST            | 9252s              |
| p-JNK                              | Rabbit Polyclonal Antibody | 1:1000          | CST            | 9251s              |
| p38                                | Rabbit Polyclonal Antibody | 1:1000          | CST            | 9212s              |
| p-p38                              | Rabbit IgG (12F8)          | 1:1000          | CST            | 4631s              |

|                              |                                            |        |             |          |
|------------------------------|--------------------------------------------|--------|-------------|----------|
| Erk1/2                       | Rabbit IgG (137F5)                         | 1:1000 | CST         | 4695s    |
| p-Erk1/2                     | Rabbit Polyclonal Antibody                 | 1:1000 | CST         | 9101s    |
| Second antibody              | HRP conjugated goat anti-mouse IgG (A267)  | 1:5000 | TransGen    | HS201-01 |
| Second antibody              | HRP conjugated goat anti-rabbit IgG (C129) | 1:5000 | TransGen    | HS101-01 |
| <b>For ELISA</b>             |                                            |        |             |          |
| GM-CSF ELISA Kit             | Human (Cat# KE00003)                       |        | Proteintech | KE00003  |
| GM-CSF ELISA Kit             | Mouse (Cat# KE10015)                       |        | Proteintech | KE10015  |
| <b>Neutralizing antibody</b> |                                            |        |             |          |
| Isotype Control              | Mouse IgG                                  |        | Sigma       | I8765    |
| Ly6G                         | Mouse IgG2A (1A8)                          |        | BioXCell    | BP0075-1 |
